# Supplementary material for: Systematic Multiomic Analysis of PKHD1L1 Gene Expression and Its Role as a Predicting Biomarker for Immune Cell Infiltration in Skin Cutaneous Melanoma and Lung Adenocarcinoma
Source: MDPI journal article supplement (doi:10.3390/ijms25010359), 2023-12-26

**Supplementary Figure S1.** Overall survival between PKHD1L1 expression and the two patient groups in skin cutaneous melanoma (SKCM) and lung adenocarcinoma (LUAD) with gender, age, and tumor stage. Kaplan-meier survival curves of high and low patient groups the split by PKHD1L1 expression with the scan-cut-off modus were scanned by R2 database with the SKCM-TCGA and LUAD-TCGA dataset. (\* $p < 0.05$ )

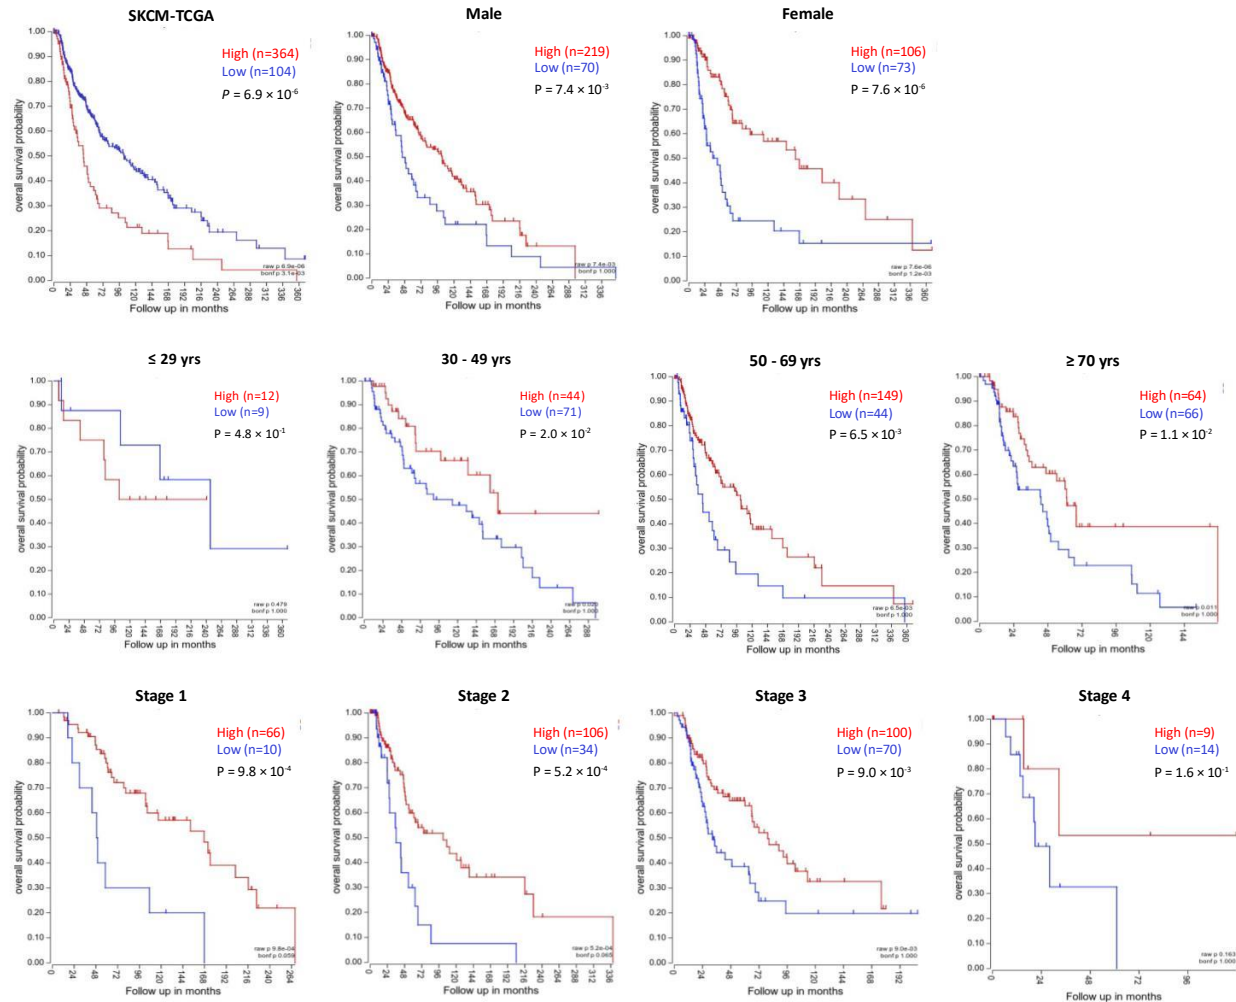

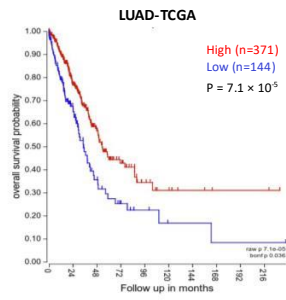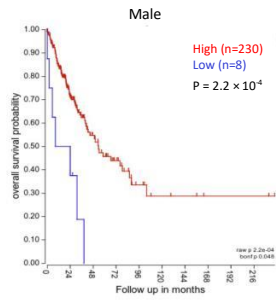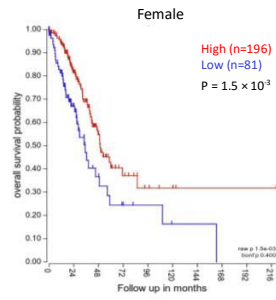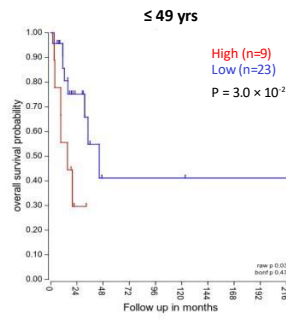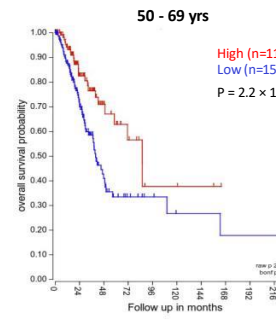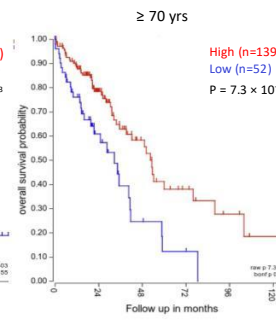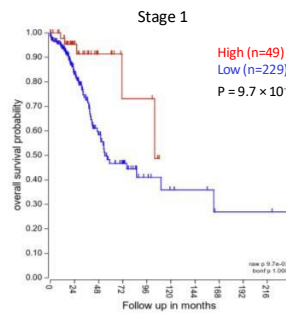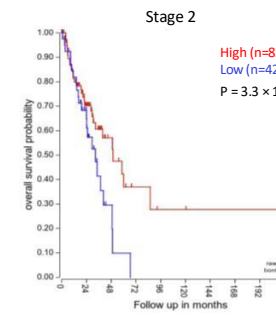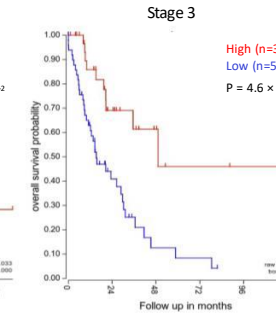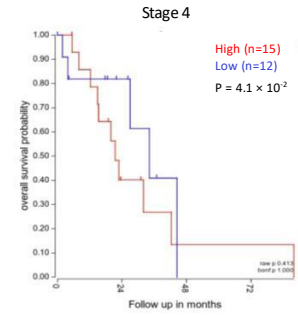

Supplement: s1 [file s1]
