# Supplementary material for: Systematic Multiomic Analysis of PKHD1L1 Gene Expression and Its Role as a Predicting Biomarker for Immune Cell Infiltration in Skin Cutaneous Melanoma and Lung Adenocarcinoma
Source: MDPI journal article supplement (doi:10.3390/ijms25010359), 2023-12-26
Supplement: s1 [file s1]

**Supplementary Table S4.** Co-expressed genes in SKCM and LUAD in Figure 6

|           |             |              |               |                 |             |
|-----------|-------------|--------------|---------------|-----------------|-------------|
| 1 CASS4   | 41 ARHGAP30 | 81 GMFG      | 121 IL7R      | 161 NCF1        | 201 RGL4    |
| 2 RBP5    | 42 TLR10    | 82 TMEM273   | 122 MAP4K1    | 162 CD2         | 202 ITGAL   |
| 3 GCSAM   | 43 JAML     | 83 SLAMF1    | 123 ZNF80     | 163 IRF8        | 203 THEMIS  |
| 4 LGALS2  | 44 SEPTIN1  | 84 RASGRP2   | 124 FMO2      | 164 CXCR6       | 204 PTPN7   |
| 5 ZAP70   | 45 PTGDR    | 85 FCRL3     | 125 TBX21     | 165 HLA-DOB     | 205 IL18RAP |
| 6 BTG2    | 46 PIK3CG   | 86 IKZF3     | 126 IL10RA    | 166 CD200R1     | 206 JCHAIN  |
| 7 PTPRCAP | 47 NIBAN3   | 87 ELMO1     | 127 GAB3      | 167 ABI3BP      | 207 CSF2RB  |
| 8 SPIB    | 48 CCL19    | 88 RGS13     | 128 TNFRSF13B | 168 WDFY4       | 208 SLAMF6  |
| 9 SLA2    | 49 TESPA1   | 89 CYTIP     | 129 KLHL6     | 169 LY9         | 209 PTGER4  |
| 10 CXCR4  | 50 IKZF1    | 90 CLEC17A   | 130 CD96      | 170 KCNN3       | 210 CCR7    |
| 11 FGL2   | 51 TCL1A    | 91 SCIMP     | 131 CCDC69    | 171 BMS1P20     | 211 CR1     |
| 12 CRTAM  | 52 ZC3H12D  | 92 ADGRG5    | 132 CR2       | 172 FLI1        | 212 PRDM1   |
| 13 CD37   | 53 CD79A    | 93 GVINP1    | 133 LCK       | 173 ANKRD36B P2 | 213 KLRB1   |
| 14 NCF1C  | 54 S1PR1    | 94 CD53      | 134 TLR9      | 174 MFNG        | 214 NLRC3   |
| 15 NCF1B  | 55 GIMAP7   | 95 RASGRP3   | 135 TIFAB     | 175 ITK         | 215 FGD2    |
| 16 PARP15 | 56 GIMAP1   | 96 CD247     | 136 KLRK1     | 176 CD69        | 216 P2RY14  |
| 17 BTLA   | 57 FLT3     | 97 TENT5C    | 137 PPP1R16B  | 177 LTA         | 217 UBASH3A |
| 18 GPR65  | 58 DOCK8    | 98 ITGA8     | 138 NCR3      | 178 SIT1        | 218 ZNF831  |
| 19 KBTBD8 | 59 PLA2G2D  | 99 PNOC      | 139 CCR2      | 179 FAM30A      | 219 ACAP1   |
| 20 PECAM1 | 60 POU2AF1  | 100 LRMP     | 140 TRAF3IP3  | 180 GGTA1P      | 220 PTPRC   |
| 21 MS4A1  | 61 MZB1     | 101 ARHGAP15 | 141 NUGGC     | 181 GIMAP6      | 221 CCR4    |
| 22 ADA2   | 62 GIMAP4   | 102 P2RY10   | 142 PRKCQ     | 182 VNN2        | 222 IL2RG   |
| 23 ADAM6  | 63 CD28     | 103 FCRL4    | 143 FCER2     | 183 CLEC10A     | 223 CXCR5   |
| 24 DOCK2  | 64 SPOCK2   | 104 INMT     | 144 MEI1      | 184 TSHR        |             |
| 25 BTN1A1 | 65 TBC1D10C | 105 P2RX1    | 145 P2RY8     | 185 ART4        |             |
| 26 BANK1  | 66 SASH3    | 106 CD48     | 146 DCANP1    | 186 GPR18       |             |
| 27 SPN    | 67 BIN2     | 107 GZMK     | 147 CD27      | 187 AOA1        |             |
| 28 CD1D   | 68 AICDA    | 108 ITM2A    | 148 TNFRSF17  | 188 ZBP1        |             |
| 29 CNR2   | 69 CD6      | 109 VSIR     | 149 CD226     | 189 TNFRSF13C   |             |
| 30 CD244  | 70 SP140    | 110 FCRL5    | 150 S1PR4     | 190 PCED1B-AS1  |             |
| 31 SH2D1A | 71 EVI2B    | 111 TRAT1    | 151 MPEG1     | 191 ZBTB32      |             |
| 32 GIMAP8 | 72 TNFSF8   | 112 XCR1     | 152 CD8A      | 192 CD3E        |             |
| 33 PLCG2  | 73 SLC9A9   | 113 STAP1    | 153 FGD3      | 193 PAX5        |             |
| 34 PLEK   | 74 CD52     | 114 ABCD2    | 154 C5ORF56   | 194 FCRL1       |             |

|    |          |    |         |     |         |     |              |     |        |
|----|----------|----|---------|-----|---------|-----|--------------|-----|--------|
| 35 | ARHGAP9  | 75 | NCKAP1L | 115 | CD5     | 155 | ARHGAP2<br>5 | 195 | POU2F2 |
| 36 | SAMD3    | 76 | ADORA2A | 116 | CD3G    | 156 | AMPD1        | 196 | BLK    |
| 37 | LAX1     | 77 | RCSD1   | 117 | BTK     | 157 | GIMAP5       | 197 | BEND4  |
| 38 | C16ORF54 | 78 | RHOH    | 118 | CD180   | 158 | GPR174       | 198 | PIM2   |
| 39 | PRKCB    | 79 | VPREB3  | 119 | CXORF21 | 159 | FCRL2        | 199 | CD40LG |
| 40 | PIK3R5   | 80 | CD19    | 120 | TAGAP   | 160 | RASAL3       | 200 | AGAP2  |

---
