# Supplementary material for: Systematic Multiomic Analysis of PKHD1L1 Gene Expression and Its Role as a Predicting Biomarker for Immune Cell Infiltration in Skin Cutaneous Melanoma and Lung Adenocarcinoma
Source: MDPI journal article supplement (doi:10.3390/ijms25010359), 2023-12-26
Supplement: s1 [file s1]

**Supplementary Table S3.** Cox regression result for polycystic kidney and hepatic disease 1-like protein 1 (*PKHD1L1*) with The Cancer Genome Atlas (TCGA) data in various types of cancers using the OncoLnc database. (\* $p < 0.01$ )

| Cancer | Cox<br>coefficient | P-Value               | FDR<br>corrected      | Rank  | Median<br>expression | Mean<br>expression |
|--------|--------------------|-----------------------|-----------------------|-------|----------------------|--------------------|
| LUAD   | - 0.293            | $9.80 \times 10^{-5}$ | $8.74 \times 10^{-3}$ | 185   | 12.2                 | 49.94              |
| SKCM   | - 0.237            | $2.20 \times 10^{-3}$ | $2.41 \times 10^{-2}$ | 1455  | 1.09                 | 17.07              |
| KIRP   | 0.412              | $9.40 \times 10^{-3}$ | $4.75 \times 10^{-2}$ | 3255  | 2.11                 | 3.81               |
| PAAD   | - 0.252            | $4.20 \times 10^{-2}$ | $1.65 \times 10^{-1}$ | 4358  | 3.79                 | 12.55              |
| STAD   | 0.169              | $4.20 \times 10^{-2}$ | $3.23 \times 10^{-1}$ | 2195  | 6.81                 | 26.39              |
| HNSC   | - 0.116            | $1.20 \times 10^{-1}$ | $4.43 \times 10^{-1}$ | 4432  | 2.16                 | 7.18               |
| BLCA   | - 0.114            | $1.60 \times 10^{-1}$ | $4.06 \times 10^{-1}$ | 6390  | 1.43                 | 5.37               |
| BRCA   | - 0.129            | $1.60 \times 10^{-1}$ | $5.32 \times 10^{-1}$ | 4937  | 2.91                 | 8.35               |
| ESCA   | - 0.21             | $1.60 \times 10^{-1}$ | $9.53 \times 10^{-1}$ | 2751  | 2.33                 | 10.41              |
| LUSC   | 0.085              | $2.50 \times 10^{-1}$ | $7.44 \times 10^{-1}$ | 5649  | 7.3                  | 17.89              |
| LIHC   | 0.108              | $2.70 \times 10^{-1}$ | $5.34 \times 10^{-1}$ | 7970  | 2.34                 | 11.67              |
| COAD   | - 0.102            | $3.50 \times 10^{-1}$ | $7.29 \times 10^{-1}$ | 7831  | 2.46                 | 5.23               |
| KIRC   | 0.074              | $3.50 \times 10^{-1}$ | $4.81 \times 10^{-1}$ | 12105 | 1.56                 | 4.73               |
| READ   | - 0.188            | $4.50 \times 10^{-1}$ | $9.62 \times 10^{-1}$ | 7662  | 2.28                 | 3.53               |
| UCEC   | - 0.075            | $4.90 \times 10^{-1}$ | $9.95 \times 10^{-1}$ | 8144  | 196.45               | 1591.71            |
| CESC   | 0.045              | $7.30 \times 10^{-1}$ | $9.02 \times 10^{-1}$ | 13204 | 2.23                 | 59.04              |
| OV     | - 0.024            | $7.60 \times 10^{-1}$ | $9.59 \times 10^{-1}$ | 13358 | 106.65               | 675.66             |
| LAML   | - 0.001            | $9.90 \times 10^{-1}$ | $9.95 \times 10^{-1}$ | 15159 | 5.49                 | 22.45              |
