# Supplementary material for: Systematic Multiomic Analysis of PKHD1L1 Gene Expression and Its Role as a Predicting Biomarker for Immune Cell Infiltration in Skin Cutaneous Melanoma and Lung Adenocarcinoma
Source: MDPI journal article supplement (doi:10.3390/ijms25010359), 2023-12-26
Supplement: s1 [file s1]

**Supplementary Table S2.** Statistical tests used in Figures data.

| Figure   | Database   | Object                          | Method                             | Sample                            | Statistical test                                 | p-value (p<0.05)                                                                                                                                                                                       |
|----------|------------|---------------------------------|------------------------------------|-----------------------------------|--------------------------------------------------|--------------------------------------------------------------------------------------------------------------------------------------------------------------------------------------------------------|
| Figure 1 | GEPIA2     | mRNA Expression level, Box plot | TCGA & GTEx projects               | SKCM<br>T(n=461)<br>N(n=558)      | ANOVA<br>Empirical Bayes method<br>One-way ANOVA | $p=2.94 \times 10^{-111}$<br>(Log2FC=-1.521)                                                                                                                                                           |
|          |            |                                 |                                    | LUAD<br>T(n=483)<br>N(n=347)      | ANOVA<br>Empirical Bayes method<br>One-way ANOVA | $p=1.66 \times 10^{-117}$<br>(Log2FC=-2.379)                                                                                                                                                           |
|          | GENT2      | Gene expression                 | Microarray datasets                | SKCM<br>T(n=547)<br>N(n=263)      | Two-sample T-test                                | $p<0.0001$<br>(Log2FC= -1.136)                                                                                                                                                                         |
|          |            |                                 |                                    | LUAD<br>T(n=2362)<br>N(n=508)     |                                                  | $p<0.0001$<br>(Log2FC= -0.767)                                                                                                                                                                         |
| Figure 2 | GEPIA2     | Survival plot (Overall)         | TCGA & GTEx projects               | SKCM<br>High(n=223)<br>Low(n=221) | Log rank test<br>(Mantel-Cox test)               | $p=1.8 \times 10^{-6}$                                                                                                                                                                                 |
|          |            |                                 |                                    | LUAD<br>High(n=239)<br>Low(n=238) |                                                  | $p=1.4 \times 10^{-3}$                                                                                                                                                                                 |
|          | Prognoscan | Survival plot (OS, RFS)         | Microarray datasets                | SKCM<br>High(n=11)<br>Low(n=27)   | Minimum P-value approach                         | $p=4.23 \times 10^{-2}$                                                                                                                                                                                |
|          |            |                                 |                                    | LUAD<br>High(n=117)<br>Low(n=21)  |                                                  | $p=3.41 \times 10^{-2}$                                                                                                                                                                                |
| Figure 4 | TISIDB     | Expression of immune cells      | gene set variation analysis (GSVA) | SKCM<br>n=472                     | Empirical bayes estimate                         | Activated B cell ( $p<2.2 \times 10^{-16}$ )<br>Activated CD8+ T cell ( $p<2.2 \times 10^{-16}$ )<br>Effector memory CD8+ T cell ( $p<2.2 \times 10^{-16}$ )<br>NK cell ( $p<2.2 \times 10^{-16}$ )    |
|          |            |                                 |                                    | LUAD<br>n=517                     |                                                  | Activated B cell ( $p<2.2 \times 10^{-16}$ )<br>Activated CD8+ T cell ( $p<1.84 \times 10^{-11}$ )<br>Effector memory CD8+ T cell ( $p<2.15 \times 10^{-16}$ )<br>NK cell ( $p<1.61 \times 10^{-11}$ ) |

|          |                      |             |                                                                                               |                              |                                                                                   |                       |                                                                                                                          |
|----------|----------------------|-------------|-----------------------------------------------------------------------------------------------|------------------------------|-----------------------------------------------------------------------------------|-----------------------|--------------------------------------------------------------------------------------------------------------------------|
| Figure 5 | TIMER<br>Version 2.0 | Correlation | EPIC<br>QUANTISEQ<br>MCP_COUNTER<br>CIBERSORT_ABS                                             | SKCM (n=471)<br>LUAD (n=515) | Bayesian statistics<br>Gibbs sampling<br>Expectation<br>maximization<br>algorithm | B cell<br>(SKCM)      | (p=5.83×10 <sup>-32</sup> )<br>(p=1.30×10 <sup>-34</sup> )<br>(p=2.56×10 <sup>-36</sup> )<br>(p=2.53×10 <sup>-12</sup> ) |
|          |                      |             |                                                                                               |                              |                                                                                   | B cell<br>(LUAD)      | (p=2.32×10 <sup>-35</sup> )<br>(p=4.44×10 <sup>-32</sup> )<br>(p=2.08×10 <sup>-40</sup> )<br>(p=1.01×10 <sup>-20</sup> ) |
|          |                      |             | MCP_COUNTER<br>CIBERSORT-ABS<br>QUANTISEQ<br>XCELL                                            |                              | Bayesian statistics<br>Gibbs sampling<br>Expectation<br>maximization<br>algorithm | CD+8 T cell<br>(SKCM) | (p=7.25×10 <sup>-72</sup> )<br>(p=3.49×10 <sup>-50</sup> )<br>(p=6.91×10 <sup>-14</sup> )<br>(p=6.91×10 <sup>-14</sup> ) |
|          |                      |             |                                                                                               |                              |                                                                                   | CD+8 T cell<br>(LUAD) | (p=2.73×10 <sup>-10</sup> )<br>(p=3.49×10 <sup>-50</sup> )<br>(p=6.91×10 <sup>-14</sup> )<br>(p=6.91×10 <sup>-14</sup> ) |
|          |                      |             | MCP_COUNTER<br>Activated<br>CIBERSORT-ABS<br>Resting<br>CIBERSORT<br>Resting<br>CIBERSORT-ABS |                              | Bayesian statistics<br>Gibbs sampling<br>Expectation<br>maximization<br>algorithm | NK cell<br>(SKCM)     | (p=2.40×10 <sup>-22</sup> )<br>(p=9.09×10 <sup>-13</sup> )<br>(p=2.50×10 <sup>-5</sup> )<br>(p=4.45×10 <sup>-4</sup> )   |
|          |                      |             |                                                                                               |                              |                                                                                   | NK cell<br>(LUAD)     | (p=1.47×10 <sup>-10</sup> )<br>(p=8.399×10 <sup>-7</sup> )<br>(p=2.16×10 <sup>-1</sup> )<br>(p=2.68×10 <sup>-1</sup> )   |

|          |              |                                                       |             |                         |                          |
|----------|--------------|-------------------------------------------------------|-------------|-------------------------|--------------------------|
| Figure 6 | UCSC<br>Xena | Profiling of<br>co-expressed<br>genes with<br>PKHD1L1 | TCGA        | SKCM(n=481)             | $p=2.53^{^{^{10^{81}}}}$ |
|          | LUAD(n=706)  |                                                       |             | $p=3.228\times10^{-35}$ |                          |
|          | TCGA         |                                                       | SKCM(n=80)  | $p=1.45\times10^{-4}$   |                          |
|          |              |                                                       | LUAD(n=410) | $p=5.97\times10^{-64}$  |                          |
